# Supplementary material for: The efficient and green synthesis of biodiesel from crude oil without degumming catalyzed by sodium carbonate supported MoS2
Source: Royal Society of Chemistry journal article supplement (doi:10.1039/d2ra04198g), 2022-01-01
Supplement: d2ra04198g1.pdf [file d2ra04198g1.pdf]

Figure. S1 GC analysis of fatty acid compositions. (A) 37 kinds of FAME standard samples; (B) the product FAME

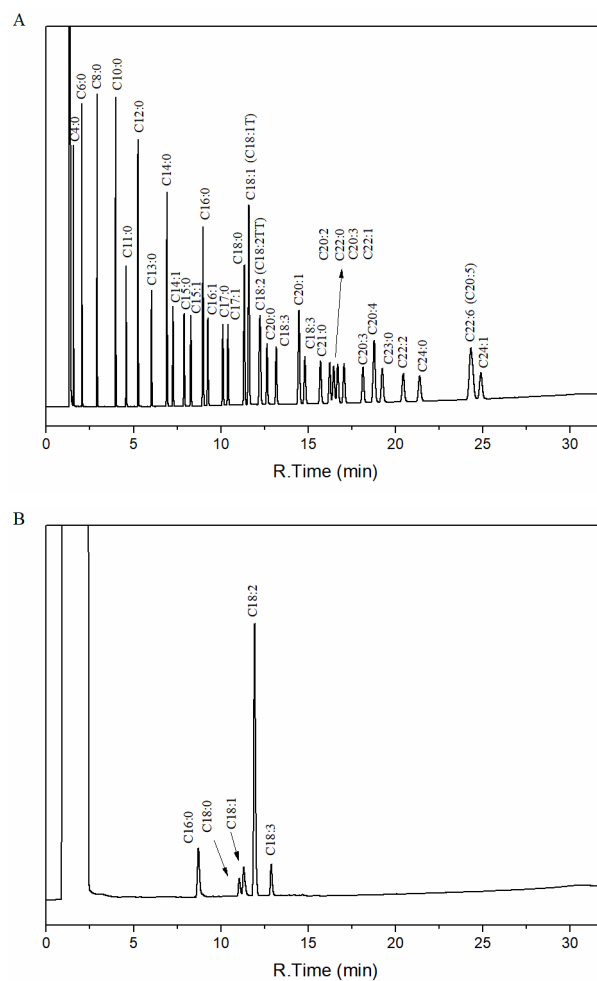

Figure. S2 The photographic images of the fresh (A) and used catalyst (B)
